# Supplementary material for: Tuning nano-skyrmions and nano-skyrmioniums in Janus magnets
Source: Royal Society of Chemistry journal article supplement (doi:10.1039/d3nr02181e), 2023-01-01
Supplement: d3nr02181e1.pdf [file d3nr02181e1.pdf]

## Electronic Supplementary Information

for “Tuning nano-skyrmions and nano-skyrmioniums in Janus magnets”

H. M. Dong,<sup>1\*</sup> P. P. Fu,<sup>1</sup> Y. F. Duan,<sup>1</sup> and K. Chang<sup>2†</sup>

<sup>1</sup>*School of Materials Science and Physics, China University of Mining and Technology, Xuzhou 221116, China*

<sup>2</sup>*SKLSM, Institute of Semiconductors, Chinese Academy of Sciences, P.O. Box 912, Beijing 100083, China*

Email: hmdong@cumt.edu.cn and kchang@semi.ac.cn

### S1. Numerical simulation method

Eq. (1) in the main text is numerically solved by Mumax3 package together with Eq. (2) [1, 2]. The magnetic dipolar interactions term  $E_{dem}$  is fully included in our simulations, which is commonly referred to as the demagnetization field. We consider a  $1024 \times 1024 \times 0.4$  nm Janus magnetic monolayer with this size  $1 \times 1 \times 0.4$  nm for the magnetic materials.  $d_0 = 0.4$  nm is taken as the effective thickness of the monolayer Janus structure in the z-direction. The Gilbert damping constant  $\alpha = 0.1$  is used, which does not affect the properties of stable states [3]. The periodic boundary condition (PBC) value is set as (5, 5, 0). The initial configuration is given as random magnetic structures. The material parameters are  $A = 11.2$  and  $13.3$  pJ/m,  $K_u = 6.0$  and  $4.1$  MJ/m<sup>3</sup>,  $D = 9.1$  and  $6.7$  mJ/m<sup>2</sup>, and  $M_s = 0.914$  and  $0.862$  MA/m for Janus MnSTe and MnSeTe respectively [4]. The formulas of Berg and Lüscher are applied to calculate the 2D topological charge  $Q$  [5]. The fixed temperature  $T = 4.2$  K is used in the whole simulations.

## S2. The simulation results of MnSeTe

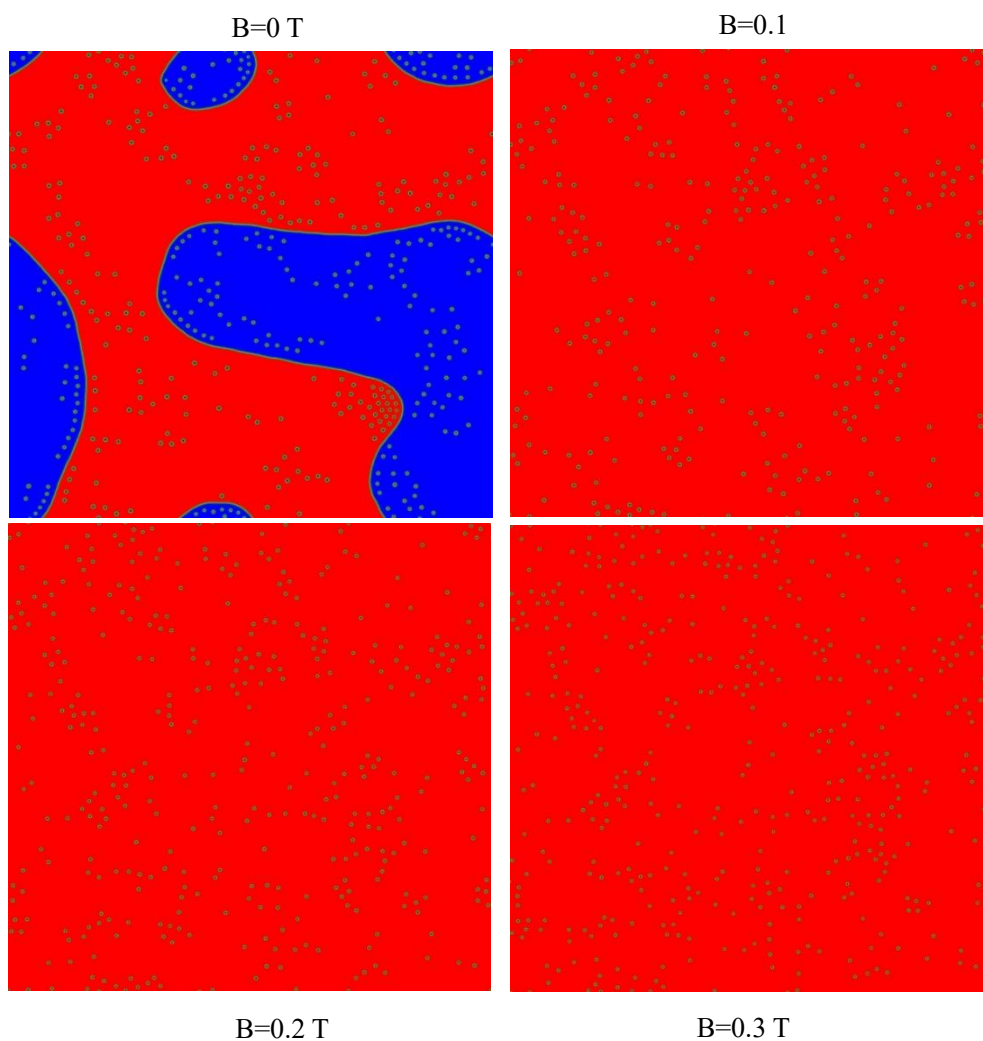

Fig. S1 Janus MnSeTe's spin textures are depicted for multiple magnetic fields in subfigures ( $1024 \times 1024$  nm each).

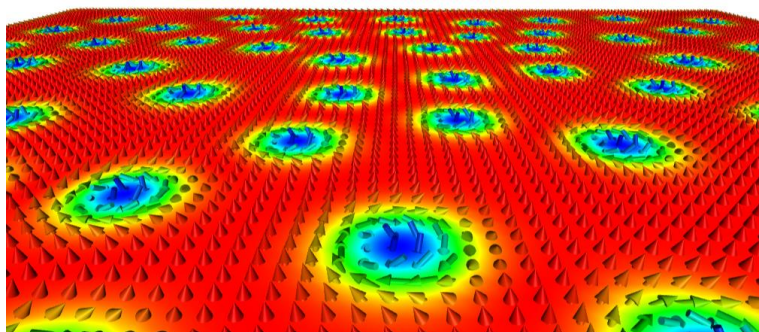

Fig. S2 The Skyrmion states of Janus MnSeTe for  $B=0.1$  T.

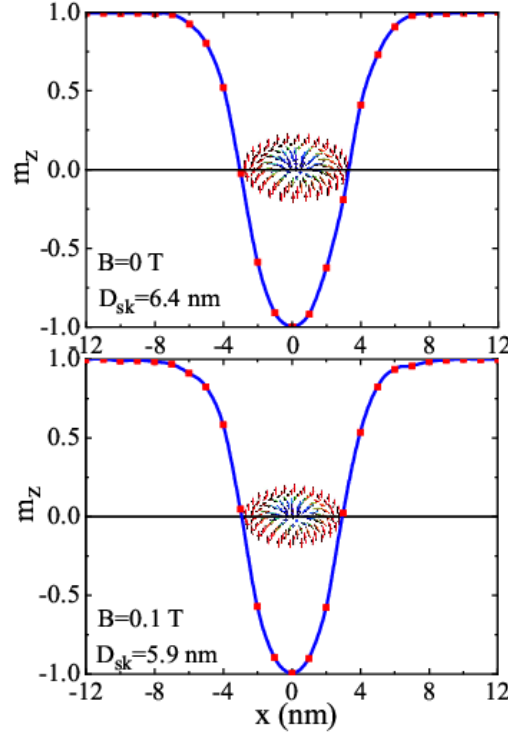

Fig. S3. The magnetization profile  $m_z$  at the center of the skyrmions ( $y = 0$ ) for  $B = 0$  T and  $B = 0.1$  T in monolayer MnSeTe. The inserts are the skyrmion profile in the  $xy$  plane respectively.

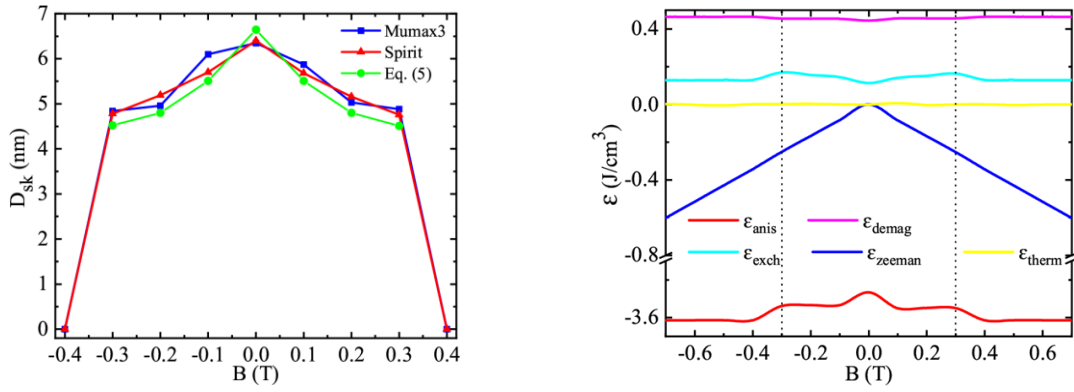

Fig. S4. (left) The evolution of the diameter of skyrmions, obtained by Mumax3 and Spirit respectively, and (right) The magnetic energy density  $\epsilon$  as a function of the external magnetic field  $B$  for MnSeTe.

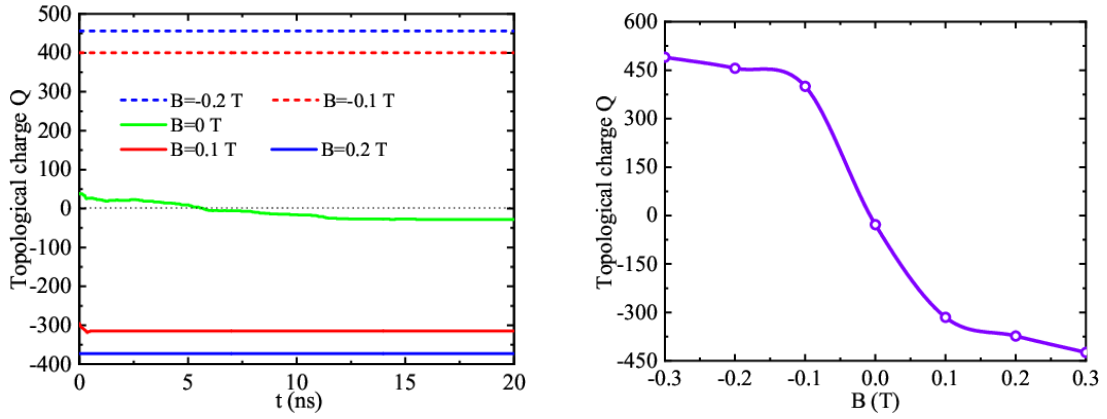

Fig. S5. (left) The evolution of the topological charge  $Q$  at the different magnetic fields  $B$  for MnSeTe. (right) The topological charge  $Q$  as a function of the external magnetic fields for MnSeTe.

### S3. The evolution of the topological charge $Q$ at the different magnetic fields $B$ for MnSTe.

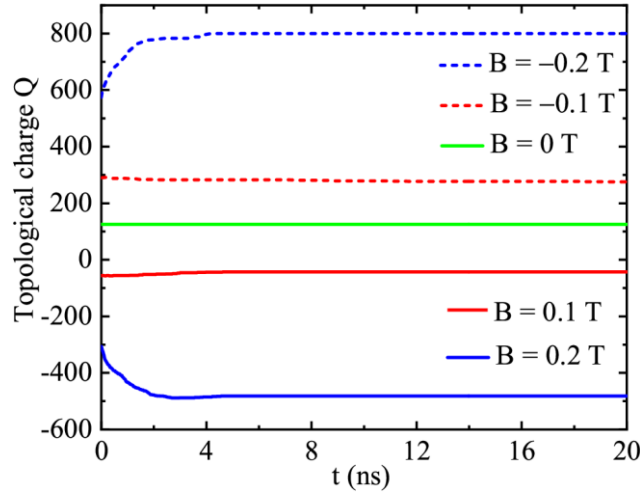

Fig. S6 The evolution of the topological charge  $Q$  at the different  $B$  for MnSTe.

In Fig. S5 and Fig. S6, the evolutions of the topological charge  $Q$  at the different  $B$  for MnSTe and MnSeTe Janus are plotted. It shows that  $Q > 0$  for  $B \leq 0$ , whereas  $Q < 0$  for  $B > 0$  in Janus magnets. The stronger the magnetic field  $B$ , the longer it takes for the system to relax to a steady state. The switching of the magnetic topological charge is achieved by changing the direction of the external magnetic fields. This characteristic is also prominently shown in Fig. 3 in the main text.

## ***References***

- [1] A. Vansteenkiste, J. Leliaert, M. Dvornik, M. Helsen, F. Garcia-Sanchez, and B. Van Waeyenberge, *AIP Advances* 4, 107133 (2014).
- [2] J. Mulkers, B. Van Waeyenberge, and M. V. Milosévić, *Physical Review B* 95, 144401 (2017).
- [3] H. Wu, X. Hu, K. Jing, and X. R. Wang, *Communications Physics* 4, 210 (2021).
- [4] J. Yuan, Y. Yang, Y. Cai, Y. Wu, Y. Chen, X. Yan, and L. Shen, *Physical Review B* 101, 094420 (2020).
- [5] Z. Liu, *Journal of Magnetism and Magnetic Materials* 39, 168369 (2021).
